# Supplementary material
Source: MDPI journal article supplement (https://www.mdpi.com/1911-8074/16/2/98)
Supplement: s1 [file s1]

Archive with 2 entries (2 files):
- Data table.xlsx
- Questionnaire.pdf
