# Supplementary material
Source: MDPI journal article supplement (https://www.mdpi.com/1911-8074/16/2/98)
Supplement: s1 [file s1 › Data table.xlsx]

## Sheet: Data table
QNo. 1.	QNo. 2.	QNo. 3.	QNo. 4.	QNo. 5.	QNo. 6.	QNo. 7.	QNo. 8.	Qno. 9.	QNo.10.	QNo. 11.	QNo. 12.	QNo. 13.	QNo. 14.	QNo. 15.	QNo. 16.	Qno. 17.	Qno. 18.	QNo. 19.	QNo. 20.	QNo. 21.	QNo. 22.	QNo. 23.	QNo. 24.	QNo. 25.	QNo. 26.	QNo. 27.	QNo. 28.	QNo. 29.
2	4	4	2	4	4	1	3	5	1	3	4	6	2	2	6	3	6	2	7	2	6	4	6	6	4	7	1	4
1	4	5	5	5	5	2	3	1	2	5	7	5	7	5	4	5	3	3	3	3	3	5	2	3	3	3	5	6
1	1	2	4	3	2	2	3	6	2	6		4	4	6	6	5	6	5		3	4	6	4	7	6	7	4	4
1	2	4	4	2	2	3	3	7	2	2	2	6	3	7	2	6	4	1	4	2	6	7	7	6	7	5	3	4
2	3	4	5	3	2	3	3	6	2	7	2	1	4	5	7	1	4	2	4	4	5	6	6	7	7	7	1	4
1	2	3	5	4	5	2	3	4	3	7	5	7	7	4	2	2	7	4	2	6	1	3	4	6	2	3	3	3
1	3	3	5	5	4	3	3	5	1	1	4	4	3	2	3	3	5	2	5	3	2	6	4	1	5	5	4	3
2	3	4	5	3	2	2	2	3	1	3	5	2	5	7	2	5	3	6	7	3	6	4		5	5	7		7
1	4	4	3	2	2	2	3	4	1	5	4	2	5	3	2	3	2	4	7	3	6	4	6	6	5	2	3	7
2	1	3	6	2	1	2	3	6	2	3	4	1	4	2	3	4	5	2	5	1	1	3	3	7	5	6	4	4
1	4	1	4	1	3	1	3	5	1	6	5	2	4	4	5	7	6		3	2	3	5	6	2		4	5
2	2	3	5	4	4	3	3	5	1	5	5	4	2	4	3	5	4	1	4	1	6	6	4	6	4	4	5	3
2	2	1	2	2	2	2	3	6	2	7	7	1	5	6	5	5	4	3	5	7	7	6	6	1	6	5	5	2
2	1	2	3	4	5	2	2	6	2	3	2	1	5	1	6	3	5	6	7	1	5	6	6	4	5	5	3	4
2	1	3	4	2	2	3	2	3	3	2	3	1	4	6	6	6	3	2	5	5	4	3	4	7	4	4	4	6
1	2	4	2	2	1	1	3	5	2	4	7	1	2	3	5	3	4	2	5	4	2	4	3	5	3	5	3	3
1	1	2	2	2	1	2	2	3	2	5	4	6	3	6	3	3	3	5	4	1	3	4	6	4	5	3	4	5
1	2	3	5	4	4	3	3	5	1	5	5	4	2	4	5	5	5	5	2	2	5	6	5	5	6	5	5	4
2	2	2	5	5	5	2	1	4	1	7	3	2	6	3	4	5	4	3	4	7	2	7	5	4	7	3	3	7
1	4	1	5	2	3	3	3	6	1	6	4	1	6	4	2	5	2	2	4	5	4	7	7	1	6	2	7	5
2	3	3	2	2	2	3	2	4	3	3	5	2	3	3	4	2	4	7	5	3	6	3	3	2	7	4	4	3
1	4	2	3	5	5	2	2	4	3	1	1	4	4	3	5	2	6	3	4	6	4	4	5	6	4	5	5	2
1	1	3	5	4	4	2	3	4	3	3	2	3	5	2	7	1	6	6	5	1	1	5	4	4	3	7	1	5
2	2	2	5	5	5	2	1	6	3	4	6	7	5	5	6	7	5	6	6	3	1	6	6	1	4	6	5	5
1	4	3	5	3	4	2	1	7	1	3	3	3	5	2	2	4	3	4	6	3	2	6	7	6	7	5	4	5
2	2	1	3	3	3	2	3	4	3	4	4	5	5	5	5	5	7	4	7	5	5	4	5	7	3	5	4	3
2	1	3	4	3	2	2	1	6	3	2	4	1	5	1	4	4	4	6	2	6	7	5	4	4	5	3	4	6
1	3	2	3	4	5	3	2	5	2	6	3	3	3	7	4	3	6	3	3	6	1	4	6	4	5	5	5	5
2	3	4	3	3	4	2	1	2	3	5	4	4	5	5	4	4	5	4	1	1	4	3	3	6	4	3	4	6
1	4	4	3	3	4	1	3	3	1	5	5	3	6	5	6	7	4	5	3	3	5	6	5	3	5	4	4	3
2	1	5	2	4	3	3	3	7	2	4	5	1	4	4	5	4	7	4	6	7	6	4	6	6	3	6	4	4
2	4	5	3	5	5	2	3	3	3	2	3	6	4	5	4	5	6	4	7	1	5	4	5	2	2	6	3	4
2	2	2	1	5	5	3	3	2	1	4	5	2	4	5	6	5	6	2	4	5	7	2	5	7	4	4	5	6
2	1	2	4	2	2	3	2	4	2	1	1	2	3	3	2	3	3	1	3	3	6	5	4	6	6	5	5	5
1	1	4	2	4	4	1	1	5	2	2	6	7	7	3	2	5	3	4	4	4	4	7	4	7	5	3	3	5
1	2	5	4	2	2	3	2	5	2	4	6	4	5	6	3	7	6	4	4	6	6	4	6	3	7	5	7	6
2	1	4	6	3	1	1	1	7	3	5	6	3		5	5	6	6	2	6	1	7	6	5	3		6	4	2
1	3	2	3	1	1	1	2	4	2	3	7	2	5	5	2	6	5	5	4	7	7	5	7	4	6	5	4	5
1	4	1	5	2	3	3	3	6	1	5	7	7	4	7	4	5	4	2	5	2	7	5	5	4	6	4	6	6
1	4	4	5	2	2	3	3	6	2	4	5	5	4	5	5	5	3	4	3	5	3	6	5	7	5	3	6	5
2	1	4	2	5	5	3	3	7	2	3	1	2	7	2	4	5	6	3	4	6	7	6	5	7	6	5	2	2
1	2	3	6	4	4	2	3	2	2	2	3	2	5	4	6	3	4	3	4	3	7	5	5	2	3	4	4	4
1	4	1	5	3	5	3	3	6	2	3	2	7	7	5	4	5	7	6	5	5	6	5	6	6	5	5	4	6
2	4	2	2	4	4	3	3	4	2	2	1	3	3	3	5	1	5	3	4	6	5	5	4	3	6	3	2	3
1	2	3	6	4	2	2	3	5	1	2	7	5	4	3	4	3	6	2	4	7	3		5	7	6	6	1	5
1	3	5	3	5	5	3	3	7	1	5	2	5	4	3	5	5	6	5	7	7	1	5	5	3	6	4	5	3
2	4	3	2	4	5	2	1	7	2	3	2	5	5	2	5	5	5	4	3	2	4	6	7	7	7	3	4	4
1	4	3	2	3	5	3	2	6	1	5	3	2	2	6	3	5	3	7	3	4	4	5	6	6	7	4	3	1
2	3	3	3	2	4	2	2	7	3	3	2	6	6	2	4	2	5	4	7	3	7	4	2	6	4	3	3	6
1	1	2	4	2	3	3	3	6	2	4	5	7	3	5	6	6	5	5	6	6	7	6	7	5	7	4	3	1
1	4	2	4	3	2	2	3	7	2	3	3	5	4	3	3	2	4	2	2	7	7	5	6	3	4	4	3	2
2	4	3	2	4	5	3	2	3	1	2	4	7	5	3	5	5	7	5	4	6	1	5	6	3	5	7	3	7
2	2	3	5	2	5	2	2	4	2	2	5	6	4	3	2	3	5	5	7	3	1	6	4	5	6	3	5	5
1	2	5	5	5	4	2	3	6	1	5	3	3	4	6	3	7	2	7	2	7	4	5	3	7	6	3	5	4
1	3	3	2	2	2	2	2	3	2	7	3	2	2	4	2	3	3	3	3	2	5	4	3	7	4	3	4	2
1	1	3	4	3	2	1	2	6	2	2	3	2	6	2	4	3	4	4	3	3	7	7	7	1	6	5	2	6
1	1	2	5	2	5	3	1	4	2	6	7	4	6	4	4	7	5	4	2	3	5	4	3	7	6	4	4	7
1	1	2	3	3	1	2	2	4	2	3	5	3	6	5	5	6	4	7	7	6	4	7	4	7	5	7	4	6
1	3	2	1	3	5	2	2	6	1	3	6	1	6	4	5	4	5	6	5	4	6	7	7	5	5			6
2	3	3	1	2	3	3	3	4	3	2	2	4	2	5	6	2	6	3	4	2	7	3	5	7	6	7	3	4
2	4	3	3	4	5	2	3	5	3	4	5	5	3	5	4	2	4	2	4	3	6	3	4	6	2	3	4	4
1	2	3	4	2	2	2	3	7	3	5	3	2	3	2	6	3	3	4	1	2	6	5	6	1	4	4	5	4
2	3	5	3	4	3	2	3	1	2	4	6	5		7	3		3	5	5	7	1	4	5	7	4	1	4	4
1	3	4	3	5	4	3	3	4	2	5	4	6	2	5	7	2	7	6	4	3	6	6	4	1	5	6	7	4
1	4	3	4	4	3	3	3	7	1	3	2	4	5	3	1	3	6	3	3	4	7	6	6	6	7	4	4	3
1	4	4	1	3	2	1	2	4	2	5	5	6	6	2	4	4	4	4	5	3	3	4	4	5	5	3	3	3
2	3	5	2	3	3	1	3	5	1	5	4	7	4	4	5	5	3	2	4	1	5	7	7	6	7	5	3	4
1	3	1	3	4	4	2	2	6	2	6	4	6	6	5	3	3	3	5	3	6	7	5	4	7	3	4	3	5
2	4	2	2	5	5	1	3	5	3	4	3	6	2	4	7	5	6	3	7	7	6	7	7	6	4	6	3	7
1	3	2	2	4	4	3	3	6	1	2	5	6	4	2	5	3	7	4	7	4	2	7	6	5	3	7	2	4
1	2	3	2	3	4	2	1	5	2	1	3	2	7	2	3	1	4	3	4	2	4	6	4	7	5	3	3	5
1	1	2	4	3	2	2	2	7	3	5	5	1	6	2	6	6	4	7	4	7	1	6	7	1	6	3	5	4
1	1	5	2	3	2	3	3	4	3	3	3	1	5	4	5	5	6	5	2	4	1	7	7	4	7	3	3	5
2	3	5	6	3	1	2	3	5	1		4	7	2	5	4	5	7	3	4	5	6	7	6	5	7	5		3
2	2	5	5	2	1	2	3	4	2	2	4	4	4	7	4	3	4	4	6	5	4	7	5	4	7	7	3	2
1	4	2	2	2	1	2	1	7	2	1	3	3	1	4	3	3	3	4	2	2	6	5	6	1	6	4	2	7
2	2	2	3	4	2	1	3	5	2	4	3	4	3	2	3	4	5	3	4	2	1	7	5	3	5	5	4	2
2	4	4	3	4	3	3	2	3	2	4	5	1	3	4	7	6	5	2	4	1	3	5	4	5	4	5	3	2
1	2	4	2	2	5	3	2	6	2	3	3	3	2	2	4	2	6	3	5	6	3	4	4	7	7	5	3	3
1	3	2	2	2	5	1	2	3	3	3	4	6	7	4	6	4	5	4	4	6	6	6	4	3	5	5	4	6
1	4	2	2	2	4	2	1	6	2	4	3	5	5	3	6	5	6	6	5	5	3	6	7	7	6	6	4	6
2	3	2	5	2	4	2	1	4	3	2	7	6	4	2	3	7	2	4	4	6	4	5	5	5	4	4	1	4
1	2	4	4	3	3	3	1	7	3	2	4	1	7	2	3	2	4	7	5	2	2	7	6	4	6	1	1	5
2	3	2	2	2	2	3	2	6	3	4	3	2	6	4	6	2	6	4	6	6	2	5	7	5	6	5	7	4
2	1	4	2	4	4	1	1	6	2	3	4	3	5	5	3	7	5	5	4	4	4	4	5	1	6	5	5	5
2	4	2	1	4	4	3	1	5	3	2	3	4	3	7	4	4	4	5	7	1	6	5	6	4	5	3	5	2
1	4	5	2	4	4	3	3	5	3	5	4	4	3	5	6	5	5	3	7	5	7	6	7	6	7	7	4	5
2	2	2	3	2	4	2	3	7	2	2	3	2	6	2	2	2	3	4	4	4	5	7	7	5	7	5	3	6
2	4	5	5	4	5	3	2	6	2	1	4	7	7	3	6	3	6	5	6	5	6	5	6	5	7	7	2	7
2	3	3	5	4	5	2	3	4	3	3	4	7	2	5	4	4	4	2	6	2	3	7	5	7	7	3	4	4
1	1	3	6	2	3	2	2	3	1	3	2	4	4	4	6	3	6	5	5	3	4	2	3	3	5	5	4	6
2	2	4	3	2	4	2	3	6	1	5	2	6	5	3	4	4	6	4	6	5	7	6	5	2	6	3	4	5
1	4	2	3	3	4	2	2	4	1	7	5	4	5	5	6	3	3	6	2	1	2	2	4	7	5	4	5	4
1	2	4	2	2	1	1	3	4	3	5	5	7	5	3	2	3	3	5	5	3	6	6	5	5	5	2	5	6
2	1	5	1	4	4	3	1	5	2	5	2	7	6	6	4	4	4	4	4	1	1	7		6	4		4	5
2	3	5	2	2	1	2	3	5	2	4	4	6	2	5	3	5	5	3	2	4	3	5	5	6	4	3	4	2
1	4	4	5	3	1	3	3	3	3	6	7	5	1	5	2	7	2	3	5	4	2	5	2	7	5	2	6	4
2	4	2	2	2	2	3	1	3	2	7	3	7	3	4	4	4	3	2	5	5	3	4	3	5	2	6	4	1
2	2	4	6	3	5	3	2	4	1	3	3	7	5	4	6	2	3		3	1	7	6	4	5	2	2		2
2	2	1	3	2	2	1	2	4	1	3	3	6	5	2	2	1	4	3	4	7	5	6	3	4	4	3	2	4
2	1	2	2	2	5	2	2	4	1	2	4	7	4	4	3	2	3	3	4	5	3	4	4	2	6	3	3	3
2	3	3	5	2	2	2	3	4	1	4	4	7	2	4	3	2	4	2	2	1	1	3	3	3	4	2	6	3
1	1	2	4	1	1	3	3	6	3	5	5	3	4	7	2	4	2	2	4	2	2	7	7	5	7	4	4	3
1	4	1	1	3	3	1	1	5	3	6	6	1	7	3	5	3	5	6	5	4	5	5	5	6	5	5	5	3
2	2	4	1	2	2	1	1	2	1	6	3	3	1	3	7	3	7	5	6	4	1	2	1	6	5	7	2	2
1	2	1	3	2	1	2	3	7	3	5	2	3	2	3	5	2	5	1	5	6	6	5	3	5	7	6	4	3
1	3	2	5	2	3	2	2	7	3	5	5	1	5	5	6	7	5	6	7	6	5	7	7	4	7	7	5	4
1	4	1	4	3	1	3	2	7	2	7	6	4	2	5	5	4	6	3	6	4	2	7	6	1	5	5	7	5
2	1	2	3	2	3	3	2	3	1	2	5	7	3	6	5	2	2	2	5	4	7	4	5	4	5	3	4	2
1	4	1	1	5	4	2	2	6	2	3	3	2	5	3	6	6	6	5	5	3	4	7	7	1	6	6	3	5
1	4	2	1	2	3	1	2	5	1	1	6	6	4	6	1	4	5	4	7	5	3	3	3	4	5	3	2	7
2	3	3	2	3	2	2	3	6	1	3	5	1	7	4	5	4	2	5	7	1	5	5	6	6	5	3	3	5
1	4	1	2	3	2	2	2	7	3	3	4	6	4	3	3	5	4	4	4	5	4	6	7	1	7	5	3	7
2	3	5	2	5	5	3	3	3	1	4	6	3	6	7	7	2	6	4	4	7	2	4	6	6	7	5	3	5
2	3	1	4	3	3	3	3	4	2	6	6	3	3	6	5	4	4	1	6	2	7	6	7	4	7	7	4	4
1	1	3	5	2	4	2	1	7	2	3	4	4	5	2	4	2	2	5	5	5	7	5	6	6	6	3	5	4
2	3	3	4	2	2	3	3	5	1	4	5	5	3	6	1	4	1	2	4	5	4	5	3	4	4	3	3	3
2	1	4	2	4	3	3	1	6	3	3	1	1	6	3	6	2	5	4	6	6	2	5	3	7	5	5	3	5
2	1	4	2	2	4	2	3	5	1	5	4	5	3	1	6	3	7	3	5	1	5	6	4	6	6	6	3	1
1	4	2	2	3	3	2	1	7	1	2	4	4	3	2	4	3	5	5	4	7	6	5	2	4	3	6	2	4
2	4	3	3	4	5	2	1	5	2	4	3	5	3	3	6	2	4	7	7	1	5	5	6	3	5	4	3	4
1	2	2	4	3	2	2	3	5	2	3	3	5	5	4	4	2	4	6	3	1	2	5	3	7	4	6	5	5
1	3	5	3	2	2	2	3	4	3	3	4	3	7	4	6	2	4	6	4	3	1	6	4	4	5	5	4	5
2	3	5	5	2	1	3	3	5	3	3	5	5	4	4	6	2	5	3	6	4	6	7	4	3	6	7	5	3
1	4	2	2	4	5	1	1	2	2	4	5	7	4	5	2	3	3	2	2	7	7	7	4	7	5	4	4	7
1	2	2	2	2	1	3	1	6	2	5	2	2	3	2	5	3	5	3	6	2	7	7	4	5	6	7	4	3
1	2	3	1	5	3	1	2	7	2	1	2	4	3	1	5	1	2	1	3	3	1	7	5	5	7	3	7	2
1	4	1	2	2	4	3	1	4	3	5	3	5	4	5	3	4	3	2	3	3	4	5	2	6	5	2	6	1
1	1	4	4	2	1	3	2	4	1	3	4	2	3	3	3	4	5	2	6	3	1	3	2	3	7	5	3	4
2	3	3	4	3	2	3	3	5	3	4	2	3	3	5	5	3	4	3	3	6	1	4	7	7	4	6	2	2
2	2	3	1	4	3	3	3	7	3	3	2	6	5	4	5	3	3	6	5	3	5	4	5	4	6	6	3	4
1	2	2	3	3	3	2	3	4	1	3	2	2	3	3	2	2	5	2	5	3	2	2	3	4	2	5	3	4
2	2	5	2	2	5	2	2	4	3	4	4	7	6	6	4	5	6	3	3	6	1	6	4	3	5	5	3	6
1	2	5	2	2	1	1	3	2	1	4	3	4	6	3	4	6	6	6	3	7	1	4	2	3	6	3	5	5
1	1	3	2	4	2	2	3	7	1	4	3	7	4	4	5	3	4	3	3	1	7	7	6	3	7	4	3	3
2	3	3	3	4	4	3	3	4	2	3	2	5	2	2	5	1	4	2	6	4	5	2	5	5	3	6	3	3
1	2	2	4	4	2	3	3	6	2	4	6	5	2	4	4	7	6	4	5	4	2	5	4	4	6	6	6	4
1	1	2	2	4	2	2	3	6	3	6	6	1	5	6	5	7	3	4	3	3	7	3	5	6		3	3	6
1	3	2	1	3	3	3	3	6	3	4	3	5	7	5	6	6	3	3	3	6	3	7	7	7	7	5	3	3
2	2	2	4	3	1	3	1	3	1	4	6	5	1	7	4	5	4	4	4	5	2	5	4	7	2	4	4	2
2	1	2	5	2	4	3	3	5	2	4	5	2	2	5	6	3	6	3	5	2	2	5	6	6	6	6	5	1
1	4	3	3	2	1	2	1	4	2	4	3	1	5	3	3	3	3	7	4	2	6	4	5	5	6	4	5	6
1	4	2	2	3	3	1	1	2	3	4	6	5	4	3	6	5	5	3	6	3	4	5	4	6	4	6	4	7
2	3	5	6	5	4	2	3	3	3	4	2	1	3	4	6	1	6	6	5	1	7	7	5	2	6	5	6	4
1	1	1	4	3	2	1	3	7	2	6	5	3	5	5	5	7	7	5	4	3	5	7	7	3	7	3	2	6
1	2	3	5	2	5	3	1	6	3	5	4	1	1	3	5	5	5	2	4	7	3	5	6	4	7	2	5	3
1	4	3	1	2	1	2	2	6	3	3	2	5	4	4	2	1	3	5	3	5	5	7	6	4	6	2	2	4
1	4	5	5	2	5	3	3	6	2	4	7	6	2	6	7	6	5	5	4	3	1	5	7	6	5	3	6	6
2	4	4	5	4	3	2	3	3	3	2	3	5	4	3	3	3	4	1	2	1	2	5	4	6	5	3	1	3
2	2	5	2	4	5	2	1	7	1	2	2	7	5	4	7	2	6	5	4	4	3	7	6	6	5	7	2	4
1	4	5	6	3	3	3	2	4	2	6	6	3	4	6	2	6	4	3	4	2	3	6	6	5	4	4	7	3
1	2	3	4	3	3	3	1	3	2	6	5	5	2	7	3	7	4	3	4	4	3	4	4	4	3	5	5	5
2	4	1	3	2	2	3	2	5	3	3	6	7	4	5	5	5	3	6	4	1	6	6	5	7	6	4	7	3
2	3	2	3	3	1	2	3	3	3	4	4	3	4	4	5	4	7	6	4	1	2	3	4	1	4	7	3	4
1	2	3	1	4	2	3	2	5	2	3	1	6	3	3	2	3	3	3	5	2	6	7	6	7	7	5	5	4
2	2	1	5	5	4	1	1	5	1	3	3	7	3			3	3	2	2	7	3	6	6	1	5	3	2	3
1	4	5	2	2	1	1	1	7	2	4	4	7	3	4	7	6	6	2	6	5	4	7	4	2	6	4	4	2
2	4	5	1	4	3	1	1	6	3	6	4	1	5	5	3	5	4	5	4	5	4	5	6	1	5	4	4	6
2	4	2	3	4	3	2	3	6	1	3	4	4	4	1	5	1	4	5	6	7	5	6	6	5	3	5	4	4
1	1	1	5	2	2	2	3	7	2	6	5	3	6	4	4	6	3	5	3	7	7	7	7	4	7	4	7	4
1	2	2	3	5	4	3	3	7	1	4	1	7	3	3	3	3	1	3	4	3	2	7	5	4	3	2	2	6
2	2	1	2	2	2	2	2	4	1	4	4	6	4	7	2	5	5	6	6	6	4	5	4	2	3	3	6	6
1	1	3	5	3	3	2	3	3	1	4	3	7	5	4	5	4	6	4	6	1	4	7	3	4	2	4	3	7
1	3	2	4	3	3	3	1	3	2	5	5	7	6	6	6	4	3	6	5	7	5	7	5	6	4	2	6	4
2	1	4	1	4	4	2	2	3	1	3	3	7	3	3	5	3	5	2	4	1	2	4	5	3	3	4	3	1
1	1	2	5	4	4	2	3	6	3	5	2	3	4	3	5	3	3	4	1	7	6	7	6	2	7	3	5	4
2	4	3	4	4	2	2	1	7	1	2	2	2	1	3	3	5	4	2	3	5	1	6	2	2	6	5	4
2	1	2	4	4	3	2	3	7	3	6	3	3	3	2	4	5	3	5	3	3	5	6	5	5	2	5	1	5
2	2	4	4	2	2	3	3	5	2	2	2	1	4	3	6	3	6	4	3	2	7	6	5	7	6	6	4	3
1	3	2	3	4	4	1	2	7	2	5	4	4	4	5	5	7	5	2	7	3	7	7	6	5	6	6	6	4
1	1	5	5	4	2	3	2	7	2	5	6	5	2	3	6	3	5	4	6	1	6	6	7	7	7	6	5	4
2	3	3	5	3	4	3	3	3	1	4	6	1	3	4	6	3	4	3	4	4	3	4	6	5	4	5	6	2
2	3	5	4	1	1	3	1	5	3	6	4	7	1	5	6	3	5	2	5	6	1	4	4	7	6	6	6	1
1	1	5	3	3	4	2	3	6	3	6	5	7	7	6	5	6	6	4	5	1	1	4	6	7	3	6	5	7
1	1	2	4	2	3	3	2	6	3	5	4	2	5	5	2	3	7	2	6	5	2	6	4	3	3	4	5	4
2	3	5	2	2	5	2	2	5	3	5	6	3	1	5	2	5	3	4	5	3	1	6	5	5	6	6	5	2
1	4	2	3	3	4	3	3	7	1	3	2	6	4	4	7	6	3	4	3	6	4	7	5	6	6	2	6	4
2	1	2	2	3	3	2	3	4	3	1	3	2	2	3	6	5	6	3	5	5	3	3	5	1	4	4	3	4
2	4	2	5	1	2	3	3	6	3	6	4	6	3	6	4	6	5	7	4	5	6	7	5	3	5	4	7	5
2	4	4	3	4	4	2	3	6	2	4	6	3	5	2	6	3	7	5	4	2	4	5	3	7	4	7	3	2
1	4	3	4	2	2	3	3	5	2	5	5	7	4	4	3	5	4	3	4	3	4	4	7	5	6	3	3	2
1	4	2	5	3	3	2	3	6	1	5	7	2	5	3	5	5	4	4	4	2	1	4	3	2	6	2	5	3
1	3	3	6	4	5	2	3	4	1	3	4	2	3	5	2	7	3	1	5	5	6	3	5	2	1	3	3	2
1	3	5	5	3	2	2	2	5	2	3	2	3	4	5	5	3	5	5	5	2	2	6	7	7	7	4	3	7
2	3	5	4	3	3	1	1		3	6	6	4	4	5	5	5	5	6	2	6	5	5	5	4	5	3	6	6
2	4	2	3	5	4	1	1	3	3	5	2	5	3	1	5	4	2	4	3	2	5	4	2	3	4	3	2	4
1	2	4	2	4	4	2	1	3	2	2	1	3	4	1	7	1	7	4	4	4	3	4	6	3	6	6	3	4
2	3	2	4	3	2	2	1	5	1	2	6	6	4	3	4	7	3	5	3	7	2	6	3	3	6	3	5	3
1	1	5	1	4	3	2	2	7	2	4	7	7	3	4	5	3	3	4	5	7	6	7	7	7	6	5	3	4
2	4	1	3	4	5	3	3	3	1	5	3	4	2	3	3	2	2	2	5	7	7	5	3	1	5	4	2	3
1	2	3	4	3	3	3	1	4	2	4	4	2	5	5	5	5	2	6	4	3	7	5	4	5	5	2	6	5
2	1	1	5	3	3	2	3	6	2	3	4	6	2	4	3	2	3	1	2	6	3	5	3	5	5	5	5	5
1	4	1	2	3	1	1	1	5	1	2	7	5	3	2	3	1	2	2	1	4	3	5	5	7	5	4	4	6
2	3	1	3	4	4	3	3	4	3	6	6	6	3	3	5	3	4	5	4	7	5	4	4	6	4	5	2	4
1	3	4	3	4	5	2	3	4	1	2	4	6	6	3	5	2	7	5	7	7	7	4	6	3	5	5	2	6
1	4	5	2	4	4	2	1	4	3	6	5	7	6	6	4	6	5	6	4	6	6	1	5	3	2	5	5	3
2	2	2	3	2	4	2	2	5	3	2	1	2	1	2	7	3	1	4	4	4	5	3	7	7	4	5	3	4
2	3	1	1	3	1	3	3	6	3	5	5	3	3	4	4	7	5	2	6	3	3	7	7	3		6	7	2
1	2	3	3	4	5	1	1	7	2	3	2	1	3	4	3	4	4	3	1	7	2	6	5	5	7	3	4	3
1	4	3	5	3	3	3	1	5	3	4	3	1	4	3	2	2	4	5	5	5	7	6	6	7	7	3	4	7
2	3	1	1	2	3	3	2	5	2	3	3	2	7	6	4	4	4	5	4	1	6	3	5	2	2	5	3	5
1	2	5	3	5	4	1	2	4	1	6	5	2	4	5	5	5	5	5	5	1	4	3	4	6	3	3	5	6
1	3	4	4	3	3	1	3	5	3	5	5	2	3	4	1	6	3	4	5	3	7	4	2	3	4	3	7	2
1	2	5	4	2	2	3	2	7	1	6	3	4	2	5	3	2	3	2	7	1	6	6	7	4	7	3	7	1
2	1	5	1	2	1	3	1	7	3	2	2	4	4	3	7	4	4	4	5	3	2	4	7	7	6	5	3	4
1	3	5	5	2	5	2	3	7	2	6	3	3	4	5	3	7	7	2	4	7	7	7	7	1	7	4	7	7
1	4	4	2	5	4	2	2	6	1	7	6	1	7	7	6	3	6	5	7	1	6	4	5	7	5	7	6	6
1	3	4	5	4	5	2	3	6	3	2	4	7	5	3	3	1	5	7	4	3	5	4	6	3	6	5	3	5
2	3	3	3	2	4	2	3	5	2	2	2	7	2	3	3	1	5	6	5	6	6	4	5	1	7	3	7	6
2	4	4	3	3	2	2	3	7	2	5	7	4	3	5	7	4	7	5	7	7	2	6	6	3	7	7	6	4
2	1	1	3	5	3	3	1	6	3	6	3	4	1	2	2	4	2	1	4	1	7	7	6	4	7	2	5	1
1	4	4	6	3	5	3	3	2	3	4	4	5	2	6	2	7	5	2	4	1	4	3	2	1	3	3	5	3
1	2	5	1	3	3	1	1	7	2	4	2	7	7	3	2	3	2	4	3	5	7	6	7	6	7	2	3	7
1	2	2	5	4	4	3	2	7	3	5	5	6	6	5	5	5	3	5	4	7	7	5	5	2	6	4	5	6
2	2	5	2	4	5	3	1	5	1	5	5	3	5	4	4	4	3	5	4	5	7	4	6	5	6	4	4	6
2	1	3	5	1	1	2	3	2	1	3	5	2	7	2	6	6	7	4	6	3	5	4	5	5	4	7	4	7
1	2	3	4	3	3	2	3	5	3	5	4	7	3	3	3	2	3	4	2	3	7	6	5	5	5	2	4	5
1	1	5	4	2	1	3	3	5	2	3	4	5	2	4	4	6	4	4	2	1	2	5	4	4	6	5	5	5
2	4	4	3	5	3	3	3	7	2	6	5	4	2	4	6	3	7	4	6	7	5	6	6	3	5	6	3	3
1	3	2	5	3	4	2	3	3	1	7	5	1	5	4	5	6	5	5	5	4	2	7	4	6	7	6	5	6
2	2	5	5	2	5	3	3	7	2	2	4	4	6	2	6	4	7	5	6	5	1	5	7	1	7	5	2	3
2	2	1	3	3	2	1	1	3	3	4	5	7	4	5	5	5	4	4	6	2	6	3	5	2	3	4	5	7
2	4	5	4	3	2	2	2	4	2	2	4	4	6	4	6	3	4	5	3	1	4	7	6	5	5	6	5	5
1	3	3	2	2	3	2	3	7	2	6	3	5	3	6	3	3	4	2	5	7	5	4	7	5	6	5	5	4
2	1	2	3	4	5	2	3	5	1	2	4	4	4	3	7	2	7	2	5	2	4	4	6	1	5	5	3	3
1	4	3	2	4	4	3	2	6	3	3	2	4	3	3	7	2	6	2	7	5	2	3	4	3	4	4	2	5
1	4	2	3	3	2	2	2	5	3	6	3	5	4	4	3	5	2	5	2	1	4	5	6	7	6	4	4	6
2	4	1	5	4	3	3	1	5	3	4	4	5	4	4	6	4	5	5	7	5	7	6	7	4	6	4	6	4
2	3	2	2	2	1	2	2	5	3	1	4	2	5	3	4	2	3	5	4	4	7	5	5	1	2	7	4	3
1	3	3	3	3	5	3	1	2	3	7	6	7	3	5	4	5	3	4	3	3	6	3	2	1	4	2	4	5
1	2	5	3	4	2	1	2	7	3	4	6	4	6	5	4	5	3	5	3	1	2	6	6	2	7	5	4	5
1	2	5	6	5	4	3	3	5	1	7	3	6	2	7	4	4	2	2	5	3	4	6	6	3	5	3	4	3
1	4	1	5	4	3	2	2	5	1	7	4	3	3	7	5	6	5	5	4	2	4	7	5	7	6	6	6	2
1	3	3	4	3	2	3	3	3	3	4	2	5	3	4	6	7	3	4	7	5	7	3	2	5	3	2	3	2
1	1	1	5	3	2	3	2	4	1	6	7	5	6	5	3	3	1	6	4	3	5	3	5	6	5	4	5	6
1	2	5	2	4	4	2	3	3	2	2	6	2	7	6	4	4	7	1	3	4	6	5	7	7	5	7	6	2
2	3	1	5	4	3	2	3	6	2	4	3	5	6	5	5	5	4	4	5	1	3	7	6	3	6	3	7	5
1	3	5	6	4	4	3	3	6	2	6	2	6	3	5	7	4	3	7	6	3	2	7	7	7	7	5	4	3
2	2	1	3	2	1	2	3	5	3	2	4	1	3	3	4	5	3	6	5	3	7	6	4	5	3	6	3	3
1	4	1	1	3	3	3	1	5	3	5	6	4	4	4	6	5	6	4	6	2	7	6	3	4	5	5	4	3
2	2	4	5	4	5	2	2	6	2	5	3	3	6	3	5	5	6	7	6	6	7	5	5	5	7	7	4	4
1	4	2	4	3	2	2	1	5	3	4	2	2	4	3	6	5	5	7	4	6	1	4	5	1	3	4	7	5
1	4	1	5	3	2	2	3	7	1	4	3	2	7	2	5	2	7	7	6	7	7	6	7	4	7	5	2	5
2	1	3	5	4	4	2	1	6	2	3	4	6	5	2	5	2	4	4	2	7	1	4	5	7	5	4	3	5
2	3	5	2	3	5	2	2	4	2	5	4	7	3	7	5	6	5	3	3	3	1	3	2	6	3	4	4	6
2	1	4	4	2	2	1	3	6	2	3	6	1	6	7	5	5	4	5	4	2	1	4	7	1	7	2	4	3
2	2	3	4	3	1	3	3	6	3	1	1	2	6	2	2	2	6	4	5	2	3	4	5	7	4	5	2	4
2	1	4	5	2	3	2	3	4	1	3	2	1	6	5	4	4	5	4	3	7	4	4	3	1	3	4	3	5
1	4	2	3	4	4	3	3	3	1	2	3	2	4	2	4	3	5	4	6	4	2	3	6	3	4	5	4	6
2	4	4	3	4	5	3	3	4	3	3	1	4	5	2	6	6	6	6	4	5	6	6	5	5	6	6	2	3
1	2	1	5	5	3	2	3	6	3	2	4	1	5	3	5	4	4	6	6	7	7	4	5	1	7	4	4	5
1	4	5	1	5	4	2	2	7	3	4	3	5	4	6	4	4	2	2	5	4	3	7	6	3	6	3	4	4
1	2	5	4	2	2	3	2	7	1	5	6	3	2	6	4	4	3	6	3	4	3	5	7	7	6	2	4	7
2	3	3	2	2	1	2	2	4	2	5	6	5	2	6	2	5	4	3	4	2	5	2	2	3	4	5	4	4
2	4	3	2	2	2	2	2	2	2	1	3	7	5	3	3	7	5	5	6	6	2	3	4	7	6	5	2	5
2	3	2	5	2	2	3	2	4	1	4	3	1	1	1	3	4	2	2	3	4	1	2	3	2	6	3	5	3
2	4	2	2	2	5	1	3	5	3	5	6	1	4		5	7	7	4	7	1	6	4	4	7	4	7	6
2	3	4	3	4	4	3	3	2	3	4	1	3	3	6	2	4	4	2	4	6	3	2	1	1	3	3	2	2
2	4	2	2	3	4	1	3	7	1	3	4	7	4	6	4	5	5	7	3	1	2	7	7	4	7	3	3	4
2	1	3	2	4	5	3	1	6	3	4	1	7	3	1	6	2	6	5	6	2	2	6	5	3	7	6	1	5
1	4	3	4	1	3	3	3	4	2	4	4	2	7	6	6	5		3	3	6	1	3	4	1	4	3	5	5
1	3	1	2	4	4	2	3	5	3	6	4	1	5	6	3	3	7	5	4	7	4	6	3	6	5	3	6	6
1	1	4	4	2	1	3	2		3	5	5	4	1	4	6	6	5	3		4	7	6		4	4	4	4	4
1	4	5	3	4	4	2	1	6	3	5	3	4	6	2	3	5	5	3	6	4	1	6	6	4	7	3	3	5
2	2	4	1	4	5	2	2	6	2	5	1	5	5	3	7	1	6	3	7	1	5	7	4	1	7	7	2	2
2	2	4	5	5	3	2	3	5	3	1	1	2	7	3	7	2	5	3	7	7	1	5	6	7	4	6	2	7
1	1	5	1	3	2	1	1	7	1	5	2	1	4	2	7	3	4	4	6	3	5	7	7	5	7	7	2	3
2	3	3	4	2	2	1	2	6	2	3	6	6	7	4	4	7	2	2	5	2	1	7	4	6	4	2	4	6
1	4	1	3	4	4	3	2	4	3	3	6	7	3	3	7	2	7	2	6	5	5	3	3	6	3	6	2	3
1	1	5	3	2	5	3	3	4	1	7	6	2	2	3	7	4	7	3	7	2	1	6	6	6	5	7	5	2
1	2	2	1	2	2	1	1	5	1	3	4	6	5	1	3	1	2	7	4	7	6	4	5	2	5	3	3	7
1	3	3	5	4	4	2	3	5	2	4	4	6	7	3	4	7	3	2	3	1	6	6	5	4	6	6	7	3
2	1	3	4	4	5	2	3	2	2	4	2	6	7	3	7	1	5	5	7	5	5	4	5	4	3	5	3	3
1	1	2	5	4	4	3	2	5	1	3	5	1	5	5	5	4	3	7	7	3	4	4	5	5	4	5	6	6
2	2	2	3	5	4	2	3	4	2	3	4	2	5	5	7	4	7	6	5	7	2	5	3	4	6	7	3	4
2	3	4	3	4	3	3	3	4	1	3	4	7	3	4	7	4	5	2	6	3	6	4	5	7	1	7	4	4
2	2	4	4	5	5	2	2	4	1	3	2	7	3	3	7	2	6	5	4	4	2	7	5	7	7	5	3	6
2	3	5	3	4	4	2	3	4	2	2	5	3	2	2	6	3	5	4	5	7	6	3	5	7	6	7	5	6
1	4	1	5	3	2	3	2	4	1	3	3	2	1	6	5	5	4	2	5	5	5	3	5	4	4	4	5	2
1	1	1	2	3	3	3	3	7	2	4	6	2	6	3	6	4	7	6	5	1	2	4	6	4	5	6	6	5
1	1	5	2	4	4	2	1	6	2	4	5	4	4	3	4	4	6	3	6	4	6	6	4	4	5	4	2	1
1	3	2	4	3	3	2	2	4	3	4	6	5	5	3	3	5	4	3	4	1	5	5	3	4	5	3	5	4
1	4	5	4	2	2	1	1	4	1	6	6	4	5	7	4	5	3	6	4	5	2	5	5	2	6	3	6	7
1	1	5	4	2	5	2	3	4	2	7	3	6	5	4	7	2	6	6	6	1	5	7	7	1	5	6	5	6
2	2	1	1	2	3	3	3	4	3	4	4	6	2	1	4	1	4	2	3	6	7	4	4	1	5	5	3	1
1	1	1	2	5	4	2	2	6	2	5	6	1	5	6	5	7	6	7	6	7	2	6	6	7	6	4	4	7
2	2	2	3	4	4	1	2	6	2	6	5	3	5	6	6	5	4	3	6	7	1		7	2	6	7	6
1	1	3	6	4	4	2	3	7	3	5	4	7	6	7	6	5	4	4	4	3	2	7	7	2	7	7	5	3
2	1	3	4	3	2	2	2	5	3	4	2	3	4	5	3	2	4	4	1	1	7	3	3	1	5	3	2	2
1	2	4	2	2	4	2	1	2	2	3	2	1	7	4	5	5	4	6	6	6	2	4	4	3	3	5	5	6
1	4	1	5	3	1	2	3	7	2	3	2	3	5	5	5	2	7	4	7	1	4	7	5	2	6	6	5	4
1	3	4	3	4	4	2	3	5	3	3	4	2	7	5	6	2	5	5	4	6	5	7	7	1	5	6	4	3
1	2	1	4	2	1	2	3	7	3	6	6	1	5	3	6	6	3	2	4	3	2	7	7	3	7	5	5	7
1	4	3	4	3	2	3	2	7	3	2	4	2	1	5	4	3	1	5	3	7	3	6	7	6	7	3	4	1
2	3	2	4	3	2	2	1	4	1	5	4	6	5	6	5	6	7	6	6	3	3	5	5	7	7	5	6	6
1	2	5	1	1	4	3	1		3	6	4	7	4	3	6	7	4	5	6	4	7	5	6	7	6	5	7	7
2	2	4	4	4	5	3	2	5	3	2	1	6	3	1	5	1	5	4	5	4	1	4	4	5	4	6	3	4
2	3	4	3	2	1	3	3	3	3	3	4	6	4	4	5	3	4	4	5	3	3	6	5	1	6	4	3	4
2	4	5	4	4	5	3	2	7	1	5	4	1	3	4	7	4	5	4	7	3	4	6	3	1	4	5	3	5
1	1	2	5	3	3	3	1	5	1	4	4	1	5	4	5	2	1	5	2	3	6	2	3	2	3	3	3	7
2	3	3	1	5	5	2	1	6	1	2	3	5	4	5	6	2	5	4	7	3	3	3	5	3	2	7	3	3
2	4	3	4	4	5	2	2	6	2	2	7	2	2	1	4	1	4	3	4	5	1	3	5	1	4	6	5	3
2	3	1	5	4	4	2	2	2	1	2	1	1	4	3	5	2	3	2	2	2	1	5	3	2	5	2	5	4
2	3	5	2	5	4	2	1	7	1	4	6	3	2	4	6	6	3	2	3	7	6	6	3	1	7	5	6	3
2	1	2	4	2	2	2	3	4	1	5	4	3	4	5	6	4	7	4	6	6	7	3	6	5	5	6	3	5
1	2	2	1	3	4	1	3	7	2	7	6	5	4	7	4	4		6	3	2	4	6		4	6	3	6	5
1	1	1	4	2	3	3	3	5	1	2	3	1	7	3	4	3	7	3	4	7	5	1	3	2	6	5	7	6
1	4	2	4	3	2	3	3	6	3	3	3	2	4	4	4	6	6	4	1	2	3	4	6	4	7	5	4	3
1	4	3	3	3	2	1	1	3	1	4	6	1	6	3	5	6	4	7	3	5	3	6	4	7	4	4	6	4
2	4	5	4	3	3	3	2	6	1	5	5	5	2	5	5	6	7	2	5	3	6	6	5	5	7	4	6	1
1	4	3	4	2	2	1	1	4	1	1	3	2	6	2	4	2	4	5	4	3	3	6	6	2	5	7	4	7
1	4	4	2	4	4	2	3	4	3	4	5	1	5	5	4	5	4	4	4	4	3	6	5	6	3	3	4	7
1	1	4	3	3	3	2	3	6	3	4	3	3	5	1	5	3	6	5	7	4	5	3	2	4	4	3	4	2
1	3	2	2	2	1	3	3	5	3	6	5	1	5	3	6	5	3	5	6	7	5	3	5	4	2	6	6	4
2	2	3	3	2	4	2	3	4	1	3	4	4	4	2	5	1	6	3	5	5	1	4	4	4	7	5	4	3
1	3	5	1	4	4	2	1	6	1	6	6	6	6	5	5	5	7	3	7	2	3	3	3	7	4	5	6	5
2	4	2	4	4	5	3	3	7	1	1	6	6	3	7	5	5	7	2	6	1	1	6	4	4	6	6	5	5
2	3	3	4	2	2	1	2	4	2	5	3	5	4	3	5	4	4	3	4	7	3	6	3	7	5	5	4	1
2	1	2	4	3	3	3	2	6	2	4	3	7	3	4	7	6	4	4	6	7	2	7	7	7	7	5	5	3
1	3	5	5	3	4	2	3	7	2	5	5	5	4	6	4	5	2	5	4	5	1	5	5	3	3	3	5	6
1	2	2	2	2	4	2	2	7	2	4	5	6	5	3	3	6	5	5	6	1	6	7	7	4	7	4	5	3
1	4	2	2	2	5	1	3	7	2	4	7	6	2	3	6	4	6	4	5	7	5	5	6	6	7	6	3	4
2	1	3	1	4	5	1	3	6	2	5	3	3	3	7	3		3	3	5	4	5	4	5	7	4	4	4	4
2	3	3	5	3	4	2	1	7	3	3	5	7	4	2	6	3	1	5	5	7	6	4	4	6	2	1	4	6
1	3	1	2	4	4	2	1	5	1	3	5	7	4	3	5	5	5	4	5	3	7	5	4	1	3	6	4	1
1	3	4	1	5	4	3	1	4	1	4	6	7	3	3	3		2	4	5	7	4	6	4	3	6	5	5	4
2	3	1	1	2	1	2	3	5	1	2	3	6	4	5	2	5	3	5	3	6	3	4	4	7	5	2	4	2
1	4	3	2	3	1	3	1	3	1	4	5	3	4	5	3	5	4	4	2	5	1	2	5	6	4	3	6	4
1	3	3	1	5	4	2	1	4	1	4	5	7	4	5	3	7	4	7	3	4	4	3	4	6	4	4	6	2
2	3	5	2	5	4	3	3	7	3	3	4	6	4	4	6	3	5	3	3	1	3	4	7	5	5	4	3	4
1	4	2	2	3	1	2	3	6	3	6	4	5	3	7	5	5	3	7	3	6	1	6	5	6	7	5	7	4
1	1	3	2	2	4	1	2	7	3	2	3	3	2	3	7	3	4	4	5	7	4	7	5	7	5	5	4	4
2	4	4	3	3	5	1	1	6	3	3	5	5	3	2	4	4	2	4	3	3	5	6	6	6	6	5	4	4
2	2	3	3	4	4	3	3	3	3	2	2	5	2	3	5	1	3	2	6	6	2	5	4	7	3	4	3	5
2	3	4	4	3	2	1	1	3	2	4	7	2	5	7	4	4	5	6	5	2	2	3	4	1	4	4	4	5
1	2	5	3	2	3	2	3	7	2	3	6	4	7	6	1	3	3	5	1	6	5	7	4	6	5	3	5	4
2	4	1	4	2	2	2	3	6	2	4	5	6	2	3	3	6	7	4	4	7	5	5	4	6	3	3	5	3
2	2	3	1	3	3	3	1	4	2	4	5	1	3	6	3	4	5	4	2	2	4	5	5	5	3	2	4	7
1	2	2	4	5	3	2	1	3	1	6	3	4	5	3	5	3	2	7	3	4	7	4	3	6	4	4	2	6
1	2	4	4	3	3	2	3	5	2	4	3	3	7	2	2	7	4	7	3	7	3	5	7	4	7	3	3	4
2	4	5	2	2	3	2	1	3	3	2	7	1	4	6	5	4	3	7	4	1	6	4	2	1	4	7	4	5
1	2	5	4	4	5	3	2	6	2	2	3	1	6	2	6	3	7	5	6	2	3	7	5	4	7	5	4	6
2	1	1	2	4	2	2	2	4	3		2	3	3	1	3	2	1	2	3	1	3	3		2	3	2	2	1
1	3	4	2	2	3	3	3	5	1	4	3	6	5	7	7	2	6	4	3	2	7	6	5	3	6	4	4	3
2	4	3	3	5	3	3	1	3	2	2	4	4	2	3	5	4	6	2	6	6	4	3	2	7	7	6	5	2
2	1	1	5	2	4	3	2	4	3	5	6	2	1	5	5	5	5	7	6	5	1	2	3	5	4	5	3	2
2	3	4	4	2	1	2	3	4	1	5	5	7	7	4	6	7	5	2	6	5	4	5	4	2	5	4	4	3
2	1	2	5	4	5	2	1	7	1	1	4	4	3	4	6	2	5	5	2	2	2	6	3	6	7	2	1	3
2	1	5	3	4	5	3	3	7	3	5	3	1	4	4	6	4	7	4	5	7	5	7	7	3	7	6	2	1
1	3	3	4	4	5	3	2	4	2	3	3	4	5	5	5	5	5	4	4	7	7	4	3	4	2	5	3	4
1	2	2	2	3	4	1	2		2	2	4	7	4	5		6	4		7	7	4	6	7	3	6	6	5	6
2	3	5	2	4	5	3	3	7	2	3	7	2	4	2	6	4	5	4	6	6	7	4	4	2	7	4	5	5
2	3	1	5	3	3	2	3	4	3	3	3	7	1	1	4	2	5	2	6	6	5	4	4	6	2	6	2	1
1	4	1	5	4	3	2	2	2	1	6	3	1	4	4	6	5	6	3	6	6	1	3	5	5	4	7	4	2
1	4	4	4	1	1	2	3	6	1	3	2	2	4	3	4	2	6	5	7	7	2	7	4	7	6	6	1	5
2	3	4	4	3	2	1	3	4	2	6	6	4	4	7	4	6	5	2	5	4	3	4	4	7	5	7	3	4
2	3	5	5	3	4	1	3	5	2	5	4	5	5	3	5	5	5	5	4	1	7	5	5	7	5	5	4	5
1	4	1	4	5	3	2	2	4	2	3	3	7	2	2	5	4	5	5	6	7	3	7	7	6	5	4	2	4
1	1	5	4	2	1	3	3	6	1	7	5	4	4	5	3	5	2	3	5	1	4	6	5	7	6	2	5	3
1	3	3	5	4	4	2	2	4	1	7	3	4	6	3	4	5	4	3	4	7	2	7	5	4	7	3	3	7
1	3	2	4	1	1	3	3	6	3	6	4	6	6	4	2	5	2	2	4	6	7	7	7	1	6	2	7	5
2	3	3	3	2	1	3	3	4	1	3	5	7	3	3	4	2	4	7	5	2	2	3	3	4	7	4	4	3
1	4	2	3	1	2	3	2	4	1	1	1	5	4	3	5	2	6	3	4	5	2	4	5	5	4	5	5	2
1	1	3	3	4	5	3	2	4	3	3	2	2	5	2	7	1	6	6	5	3	6	5	4	5	3	7	1	5
1	2	2	3	3	3	3	1	6	3	4	6	4	5	5	6	7	5	6	6	3	1	6	6	1	4	6	5	5
1	3	3	5	2	3	3	1	7	3	3	3	3	5	2	2	4	3	4	6	6	6	6	7	3	7	5	4	5
2	3	2	1	4	4	1	3	4	2	4	4	3	5	5	5	5	7	4	7	7	3	4	5	4	3	5	4	3
2	4	3	2	2	1	2	3	6	1	2	4	3	5	1	4	4	4	6	2	2	3	5	4	3	5	3	4	6
1	2	5	6	2	1	3	3	5	1	6	3	6	3	7	4	3	6	3	3	4	5	4	6	7	5	5	5	5
1	4	1	4	5	3	3	2	2	2	5	4	6	5	5	4	4	5	4	1	3	4	3	3	1	4	3	4	6
1	2	4	3	2	2	3	2	3	3	5	5	6	6	5	6	7	4	5	3	1	6	6	5	2	5	4	4	3
2	2	5	3	2	4	3	1	3	2	2	3	3	4	5	4	5	6	4	7	4	5	4	5	2	2	6	3	4
2	3	5	3	2	3	2	3	2	1	4	5	7	4	5	6	5	6	2	4	5	2	2	5	2	4	4	5	6
2	2	2	1	3	4	2	2	4	1	1	1	5	3	3	2	3	3	1	3	6	5	5	4	1	6	5	5	5
1	3	3	2	5	4	1	2	5	3	2	6	5	7	3	2	5	3	4	4	2	6	7	4	2	5	3	3	5
1	3	5	4	3	2	2	3	5	1	4	6	5	5	6	3	7	6	4	4	7	1	4	6	5	7	5	7	6
1	4	5	5	4	5	2	3	4	2	3	7	1	5	5	2	6	5	5	4	5	5	5	7	6	6	5	4	5
1	2	1	2	4	4	3	3	6	3	5	7	5	4	7	4	5	4	2	5	7	4	5	5	3	6	4	6	6
1	4	1	4	3	2	2	3	6	2	4	5	6	4	5	5	5	3	4	3	4	4	6	5	2	5	3	6	5
2	2	4	2	4	4	2	3	7	2	3	1	6	7	2	4	5	6	3	4	4	4	6	5	6	6	5	2	2
1	2	3	5	3	3	1	1		2	1	3	1	5	4	6	1	4	3	4	2	1	5	5	3	3	4	4	4
1	1	1	3	2	1	1	1	6	3	3	2	7	7	5	4	5	7	6	5	7	6	5	6	6	5	5	4	6
2	4	2	2	5	4	3	3	4	1	2	1	2	3	3	5	1	5	3	4	3	1	5	4	4	6	3	2	3
1	4	3	5	2	5	3	3	5	3	2	7	3	4	3	4	3	6	2	4	1	7	3	5	2	6	6	2	5
1	3	5	5	5	3	3	3	7	3	5	2	1	4	3	5	5	6	5	7	5	3	5	5	1	6	4	5	3
2	1	4	3	2	3	1	1	7	2	3	2	3	5	2	5	5	5	4	3	1	5	6	7	5	7	3	4	4
1	1	3	4	2	2	3	1	6	3	5	3	4	2	6	3	5	3	7	3	3	1	5	6	5	7	4	3	1
1	4	2	4	2	1	1	1	6	2	4	5	1	3	5	6	6	5	5	6	1	7	6	7	4	7	4	3	1
2	4	3	5	3	2	2	2	4	2	2	5	3	4	3	2	3	5	5	7	3	1	6	4	3	6	3	5	5
1	2	3	5	4	5	3	3	3	1	7	3	1	2	4	2	3	3	3	3	7	3	4	3	1	4	3	4	2
1	2	3	4	2	2	3	3	6	3	2	3	4	6	2	4	3	4	4	3	4	3	7	7	7	6	5	2	6
1	2	4	4	3	2	2	1	4	1	6	7	1	6	4	4	7	5	4	2	7	4	4	3	2	6	4	4	7
1	2	2	2	2	4	1	2	4	1	3	5	7	6	5	5	6	4	7	7	1	7	7	4	3	5	7	4	6
1	4	2	2	4	3	2	3	6	1	3	6	2	6	4	5	4	5	6	5	6	3	7	7	2	5			6
2	1	3	6	4	5	2	3	4	2	2	2	2	2	5	6	2	6	3	4	6	3	3	5	7	6	7	3	4
2	3	3	5	4	5	3	2	5	3	4	5	4	3	5	4	2	4	2	4	2	5	3	4	7	2	3	4	4
1	1	3	5	2	1	2	2	7	3	5	3	1	3	2	6	3	3	4	1	4	1	5	6	7	4	4	5	4
2	3	5	4	4	5	2	1	1	3	4	6	5		7	3		3	5	5	6	6	4	5	7	4	1	4	4
1	2	2	4	5	3	3	3	4	3	5	4	4	2	5	7	2	7	6	4	4	4	6	4	2	5	6	7	4
2	2	5	5	4	5	2	1	5	1	5	4	5	4	4	5	5	3	2	4	1	5	7	7	4	7	5	3	4
1	2	4	4	3	4	2	3	6	3	6	4	6	6	5	3	3	3	5	3	6	5	5	4	4	3	4	3	5
2	3	2	4	5	3	2	3	5	3	4	3	2	2	4	7	5	6	3	7	4	2	7	7	1	4	6	3	7
1	4	5	2	2	1	1	3	6	2	2	5	1	4	2	5	3	7	4	7	7	1	7	6	1	3	7	2	4
1	4	3	4	4	4	1	3	5	2	1	3	2	7	2	3	1	4	3	4	6	2	6	4	4	5	3	3	5
1	3	2	1	2	2	3	1	7	3	5	5	7	6	2	6	6	4	7	4	2	2	6	7	5	6	3	5	4
1	3	2	4	3	3	3	2	7	3	1	3	7	1	4	3	3	3	4	2	4	1	5	6	1	6	4	2	7
2	1	3	6	3	3	2	3	5	1	4	3	4	3	2	3	4	5	3	4	7	6	7	5	3	5	5	4	2
2	3	4	3	2	5	2	2	3	3	4	5	2	3	4	7	6	5	2	4	7	1	5	4	4	4	5	3	2
1	1	2	1	5	5	3	1	6	1	3	3	4	2	2	4	2	6	3	5	2	7	4	4	2	7	5	3	3
2	1	5	5	5	1	2	3	3	1	3	4	3	7	4	6	4	5	4	4	5	2	6	4	2	5	5		6
1	1	2	2	3	5	1	1	6	1	4	3	7	5	3	6	5	6	6	5	1	3	6	7	1	6	6	4	6
2	3	2	3	5	4	3	3	6	3	4	3	5	6	4	6	2	6	4	6	1	6	5	7	5	6	5	7	4
2	3	4	3	2	4	1	3	6	1	3	4	3	5	5	3	7	5	5	4	2	7	4	5	7	6	5	5	5
2	3	5	5	3	4	3	3	5	3	2	3	2	3	7	4	4	4	5	7	3	5	5	6	3	5	4	5	2
1	3	5	5	5	5	3	3	5	2	5	4	6	3	5	6	5	5	3	7	4	7	6	7	1	7	7	4	5
1	1	3	2	2	4	3	1	7	3	2	3	7	6	2	2	2	3	4	4	1	2	7	7	1	7	5	3	6
2	2	5	4	5	5	3	3	6	2	1	4	4	7	3	6	3	6	5	6	4	3	5	6	6	7	7	2	7
2	1	3	4	3	2	3	3	4	1	3	4	4	2	5	4	4	4	2	6	3	2	7	5	1	7	3	4	4
1	2	4	2	3	4	3	2	3	3	3	2	4	4	4	6	3	6	5	5	2	2	2	3	5	5	5	4	6
2	4	4	1	2	3	2	1	6	3	5	2	3	5	3	4	4	6	4	6	2	6	6	5	5	6	3	4	5
1	1	3	4	4	4	2	2	4	2	7	5	4	5	5	6	3	3	6	2	1	7	2	4	5	5	4	5	4
2	3	3	5	4	5	2	1	4	3	5	5	7	5	3	2	3	3	5	5	7	1	6	5	7	5	2	5	6
2	1	5	2	4	3	2	2	5	1	4	4	5	2	5	3	5	5	3	2	7	4	5	5	2	4	3	4	2
1	3	3	4	1	2	2	3	3	3	6	7	4	1	5	2	7	2	3	5	5	4	5	2	2	5	2	6	4
2	3	3	2	4	4	3	2	3	3	7	3	5	3	4	4	4	3	2	5	2	5	4	3	1	2	6	4	1
2	4	5	6	3	4	2	3	4	3	3	3	4	5	4	6	2	3		3	2	3	6	4	4	2	2		2
2	2	1	3	5	5	2	3	4	3	3	3	6	5	2	2	1	4	3	4	4	2	6	3	6	4	3	2	4
2	1	2	4	2	4	1	3	4	2	2	4	5	4	4	3	2	3	3	4	5	3	4	4	1	6	3	3	3
2	2	3	5	4	4	2	3	4	3	4	4	6	2	4	3	2	4	2	2	5	3	3	3	2	4	2	6	3
1	2	2	2	2	2	1	2	5	3	6	6	6	7	3	5	3	5	6	5	7	5	5	5	1	5	5	5	3
1	4	1	3	3	3	3	3	7	3	5	2	4	2	3	5	2	5	1	5	6	1	5	3	2	7	6	4	3
1	2	2	5	3	4	3	3	7	2	5	5	5	5	5	6	7	5	6	7	2	6	7	7	4	7	7	5	4
1	4	1	4	1	2	3	2	7	2	7	6	3	2	5	5	4	6	3	6	7	1	7	6	4	5	5	7	5
2	3	4	2	4	5	1	1		3	2	5	3		6	5	2	2	2	5	1	1	4	5	7	5	3	4	2
1	2	1	4	3	4	3	3	6	2	3	3	5	5	3	6	6	6	5	5	5	3	7	7	2	6	6	3	5
1	4	4	5	4	4	1	3	5	3	1	6	4	4	6	1	4	5	4	7	4	7	3	3	1	5	3	2	7
2	3	3	4	3	4	2	2	6	3	3	5	2	7	4	5	3	2	5	7	2	2	5	6	1	5	3	3	5
1	2	1	3	2	2	3	2	7	1	3	4	3	4	3	3	5	4	4	4	1	5	6	7	4	7	5	3	7
2	3	5	2	3	5	3	2	3	2	4	6	6	6	7	7	2	6	4	4	7	7	4	6	4	7	5	3	5
1	1	3	2	3	5	3	2	7	1	3	4	5	5	2	4	2	2	5	5	5	7	5	6	1	6	3	5	4
2	2	3	2	4	4	1	3	5	1	4	5	7	3	6	1	4	1	2	4	3	7	5	3	2	4	3	3	3
2	1	4	5	5	5	3	2	6	1	3	1	2	6	3	6	2	5	4	6	7	1	5	3	1	5	5	3	5
2	3	4	4	2	3	3	2	5	3	5	5	7	2	4	5	5	5	5	2	1	7	6	5	1	6	5	5	4
1	1	4	1	3	1	1	2	5	2	7	3	5	6	4	4	5	5	3	4	7	5	7	5	1	7	4	3	7
2	2	1	1	2	3	3	2	6	3	6	4	3	6	5	2	5	2	3	4	1	4	7	7	2	6	3	7	5
2	3	3	1	3	3	2	2	4	3	3	5	4	3	3	4	2	4	7	5	2	4	3	3	3	7	4	4	3
2	1	2	3	5	5	3	2	4	1	3	3	4	4	3	5	3	6	3	4	5	7	4	5	2	4	5	5	2
2	1	3	1	5	5	3	1	4	2	4	2	2	5	2	7	3	6	6	5	3	7	5	4	3	3	7	3	5
1	3	2	2	2	1	1	2	6	3	4	6	3	5	5	6	7	5	6	6	2	1	6	6	2	5	6	6	6
1	3	3	1	5	2	3	3	7	1	3	3	4	5	3	3	4	3	4	6	7	3	6	7	1	7	5	4	5
1	4	1	5	3	3	2	3	4	1	5	4	5	5	5	5	5	7	4	7	3	5	5	6	4	3	5	4	3
2	2	3	3	3	4	2	2	6	3	3	4	1	5	3	4	5	4	6	3	1	5	5	4	4	5	4	4	6
2	3	5	5	1	2	2	3	5	2	6	4	6	3	7	4	4	6	3	4	5	3	4	6	6	5	5	5	5
1	4	4	2	2	2	2	1	2	3	5	4	6	5	5	4	5	5	4	3	7	5	4	4	7	4	3	4	6
2	1	4	3	3	3	1	3	3	1	5	5	3	6	5	6	7	5	5	4	5	2	6	5	6	5	4	4	4
2	3	5	4	5	3	2	2	7	1	4	5	2	4	4	5	5	7	5	6	6	6	5	6	4	3	6	4	4
2	4	5	3	3	2	2	2	3	3	4	4	1	4	5	4	5	6	4	7	4	4	4	5	7	4	6	4	4
2	1	5	5	3	4	3	3	2	1	4	5	1	4	5	6	5	6	3	4	3	7	3	5	2	4	4	5	6
2	4	2	1	5	3	2	1	4	3	2	2	3	3	3	2	3	3	2	3	3	2	5	4	4	6	5	5	5
1	3	4	4	4	4	3	3	5	1	3	6	1	7	3	3	5	3	4	4	2	6	7	4	3	5	4	3	5
2	4	2	1	3	3	3	3	5	3	4	6	7	5	6	4	7	6	5	4	1	5	4	6	2	7	5	7	6
2	1	5	4	5	5	3	3	5	1	5	4	1	4	5	6	5	5	4	7	1	6	6	7	5	7	7	4	5
1	4	4	3	3	3	3	3	7	1	3	4	6	6	3	2	3	4	4	4	7	5	7	7	5	7	5	4	6
2	1	5	5	3	3	3	2	6	3	3	4	4	7	4	6	4	6	5	6	2	1	5	6	4	7	7	3	7
2	4	3	1	4	4	1	1	4	2	4	4	5	3	5	4	4	4	3	6	2	6	7	5	4	7	3	4	4
1	2	3	3	5	2	2	3	3	3	4	3	2	4	4	6	4	6	5	5	1	2	3	3	4	5	5	4	6
2	4	4	1	4	4	2	2	6	3	5	3	7	5	4	4	4	6	4	6	2	5	6	5	6	6	3	4	5
1	1	3	2	2	4	1	2	4	2	7	5	7	5	5	6	4	3	6	3	7	4	3	4	5	5	4	5	4
2	4	2	2	3	5	3	3	4	3	5	5	6	5	3	3	4	3	5	5	2	1	6	5	6	5	3	5	6
2	1	2	5	2	2	2	3	5	1	4	4	6	3	5	3	5	5	4	3	1	7	5	5	2	4	3	4	3
1	4	4	5	3	4	2	3	3	3	6	7	6	2	5	3	7	3	3	5	6	5	5	2	7	5	2	6	4
2	1	3	4	4	5	2	2	3	1	7	4	1	4	4	4	4	3	2	5	4	6	4	3	2	2	6	4	2
1	3	5	2	4	5	3	2	7	2	5	3	3	4	3	5	5	6	5	7	7	6	5	5	2	6	4	5	3
2	3	4	4	3	3	3	1	7	1	3	3	6	5	3	5	5	5	4	3	5	5	6	7	6	7	3	4	4
1	4	2	3	3	4	3	3	6	1	5	3	2	3	6	3	5	3	7	3	2	7	5	6	7	7	4	3	2
1	3	2	5	3	4	3	3	6	3	4	5	3	4	5	6	6	5	5	6	7	6	6	7	1	7	4	3	3
2	2	3	1	2	1	1	3	4	1	3	5	7	4	3	3	4	5	5	7	2	4	6	4	1	6	3	5	5
1	2	3	3	5	3	2	3	3	1	7	4	2	3	4	3	3	3	3	3	4	1	4	3	3	4	4	4	3
1	2	3	3	1	2	2	1	6	1	3	4	6	6	3	4	3	4	4	3	2	6	7	7	4	6	5	3	6
1	2	4	1	3	2	3	3	4	2	6	7	2	6	4	4	7	5	5	3	6	1	4	3	5	6	4	5	7
1	2	2	1	5	3	3	3	4	1	4	5	2	6	5	5	6	4	7	7	2	1	7	4	2	5	7	5	6
1	3	3	2	4	5	1	1	3	1	4	5	2	4	5	4	5	4	4	3	1	7	3	5	1	4	3	6	4
1	3	3	5	3	3	3	3	4	1	4	5	2	4	5	3	7	4	7	4	2	2	4	4	6	4	4	6	3
2	3	5	5	3	1	2	1	7	2	4	4	6	5	4	6	3	5	4	4	1	3	4	7	6	5	5	4	4
1	4	1	2	2	1	3	1	6	2	6	4	3	4	7	5	5	4	7	3	1	3	6	5	4	7	5	7	4
1	2	3	4	3	3	3	2	7	2	3	4	6	3	4	7	4	4	4	5	7	4	7	5	3	5	5	4	4
2	2	4	5	3	4	3	3	6	2	3	5	5	3	2	4	4	2	4	3	5	6	6	6	3	6	5	4	4
2	1	3	3	3	4	3	3	3	1	2	2	7	3	3	5	2	3	3	6	7	2	5	4	5	3	4	4	5
1	2	4	1	3	2	2	1	3	2	4	7	4	5	7	4	4	5	6	5	1	1	4	4	2	5	4	4	5
1	1	2	2	3	3	3	2	7	2	4	6	2	7	6	2	3	3	5	2	5	3	7	4	3	5	3	5	4
2	3	2	1	2	3	1	1	6	3	4	5	7	3	3	3	6	7	4	4	4	5	5	4	4	4	3	5	3
1	4	4	2	2	1	3	1	4	3	4	5	4	4	6	3	4	5	4	3	7	6	5	5	2	4	3	4	7
1	2	2	2	2	1	2	1	3	1	6	3	7	5	4	5	3	3	7	3	3	7	4	3	6	4	4	3	6
1	4	5	3	4	5	3	2	4	1	4	4	7	7	4	6	3	4	6	4	6	7	6	4	1	5	5	4	5
2	2	2	2	2	2	2	3	5	2	4	5	4	4	4	6	3	6	3	7	6	7	7	4	7	6	7	5	3
1	2	2	3	2	2	3	2	2	2	4	5	6	5	5	2	3	3	3	3	4	4	7	4	6	6	4	4	7
1	3	2	4	4	3	2	3	6	3	5	3	1	4	2	5	3	5	3	6	3	2	7	4	1	6	7	4	4
1	4	3	5	3	2	3	3	7	1	1	2	6	3	2	5	2	3	2	3	2	4	7	5	1	7	3	7	2
1	2	4	4	2	4	3	3	4	1	5	3	2	4	5	3	4	3	2	3	7	7	5	2	6	5	2	6	1
1	3	4	6	3	4	2	1	4	3	3	4	7	3	3	4	4	5	3	6	5	2	3	2	4	7	5	3	4
2	3	3	3	3	1	1	3	5	1	4	3	3	3	5	5	3	4	4	3	1	5	4	7	5	4	6	3	3
2	4	4	5	3	5	2	2	7	1	3	3	4	5	4	5	4	4	6	5	1	3	4	5	7	6	6	4	4
1	1	2	1	2	3	3	3	4	2	4	3	3	3	3	3	3	5	3	5	6	6	3	4	4	2	5	3	4
2	4	2	1	2	2	1	3	4	3	4	4	2	6	6	4	5	7	4	3	5	3	6	5	4	5	5	3	6
1	4	5	4	2	2	3	2	3	3	4	4	2	6	3	4	6	6	6	3	5	5	4	3	4	6	3	5	5
1	3	2	5	3	4	2	2	3	1	3	3	5	4	6	6	6	3	3	5	6	1	3	4	5	4	4	4	6
1	1	4	2	4	5	3	2	5	2	4	7	7	3	3	5	3	4	3	5	2	4	4	3	1	3	5	4	4
1	2	4	2	3	4	3	1	3	3	5	4	7	3	6	4	3	3	5	4	4	3	5	6	2	5	4	5	5
1	1	4	2	2	1	3	2	5	2	5	5	5	3	4	6	5	5	5	3	7	2	6	5	6	6	5	5	5
1	2	4	2	2	1	1	2	4	1	7	3	4	6	3	5	5	4	4	5	5	2	7	5	7	7	3	3	7
1	4	2	4	2	3	3	3	6	3	6	4	6	6	4	3	6	3	3	4	1	2	7	7	4	6	2	7	5
1	2	3	2	3	3	1	3	4	2	3	5	7	4	4	4	3	5	7	5	7	5	3	3	6	7	4	4	3
1	2	2	2	3	1	3	3	4	1	3	2	5	4	3	5	3	6	3	4	5	7	4	5	1	4	5	5	2
1	3	3	1	3	3	2	2	4	3	4	2	4	5	3	7	3	6	7	5	3	2	5	4	5	3	7	3	5
2	4	2	2	2	1	1	2	6	1	6	7	3	5	5	6	7	5	6	6	2	2	6	6	4	4	6	5	5
1	3	3	5	2	3	2	1	7	1	3	4	6	5	3	3	4	3	4	6	7	1	6	7	4	7	5	4	5
2	1	1	5	3	4	2	2	4	1	4	5	7	5	5	6	5	7	4	7	6	3	4	5	6	3	5	4	4
1	1	3	4	1	2	3	1	6	3	2	4	2	5	3	4	5	4	6	3	1	4	5	5	7	5	3	4	6
1	2	5	2	4	3	3	3	5	3	6	3	1	3	7	4	4	6	4	4	1	3	5	6	2	5	5	5	5

## Sheet: Codes
QNo.	Question	Answers	Codes
1.	What is your gender?	Femail	1
		Mail	2
QNo.	Question	Answers	Codes
2.	Where do you live?	Village	1
		City	2
		County seat	3
		Capital city	4
QNo.	Question	Answers	Codes
3.	What is your age?	18-24	1
		25-31	2
		32-38	3
		39-45	4
		Over 45	5
QNo.	Question	Answers	Codes
4.	What is your highest level of education?	Primary school	1
		Vocational school (OKJ)	2
		Higher voca-tional school (with a vocational qualification, not a basic or master's degree)	3
		I am currently still studying in higher education	4
		BSC/MSC degree	5
		Postgraduate qualification	6
QNo.	Question	Answers	Codes
5.	What is your current position at work?	Voluntary	1
		Student	2
		Employee	3
		Manager	4
		Entrepreneur	5
			6
QNo.	Question	Answers	Codes
6.	How much do you earn per month? (The values are net values in HUF.)	Below 180,000 HUF per month	1
		181,000-280,000 HUF per month	2
		281,000 - 380,000 HUF per month	3
		380,000-480,000 HUF per month	4
		Over 480,000 HUF per month	5
QNo.	Question	Answers	Codes
7.	Do you have financial goals?	It is not typical for me to formulate financial goals	1
		In some cases, I formulate financial goals (e.g. buying a car, real estate, etc.)	2
		I regularly set long and short-term financial goals	3
QNo.	Question	Answers	Codes
8.	I gather information on financial topics regularly and from several sources	It is not typical for me to gather information on financial topics, or if I do, I only gather information from a few sources	1
		Before making an investment decision, I gather information, preferably from several sources	2
		I gather information on financial topics on a daily basis, regularly using several sources	3
QNo.	Question	Answers	Codes
9.	How important is sustainability to you?	It's not important at all	1
		It's largely unimportant	2
		Slightly unimportant	3
		I am indifferent	4
		Slightly important	5
		It is largely important	6
		It is absolutely important	7
QNo.	Question	Answers	Codes
10.	During your purchases in the last two months,did you buy a product or use a service in which sustainability appeared as a decision criterion?	No	1
		I can not judge	2
		Yes	3
QNo.	Question	Answers	Codes
11.	How much more are you willing to pay for sustainably sourced products?	0	1
		1-5%	2
		6-10%	3
		11-15%	4
		16-20%	5
		21-25%	6
		Over 25%	7
QNo.	Question	Answers	Codes
12.	To what extent do you consider yourself a responsible consumer?	Not at all	1
		Usually not	2
		No	3
		Maybe	4
		Mostly yes	5
		Yes	6
		Absolutely yes	7
QNo.	Question	Answers	Codes
13.	To what extent does the existence of various sustainability certificates have an influence on your consumption?	I don't take it into account at all during my purchase	1
		This is not the influencing factor during my purchase	2
		Indifferent for me	3
		It affects my purchase to a small extent	4
		It significantly affects my purchase	5
QNo.	Question	Answers	Codes
14.	How influenceable do you consider yourself to be in making financial investment decisions?	Not at all	1
		Usually not	2
		No	3
		Maybe	4
		Mostly yes	5
		Yes	6
		Absolutely yes	7
QNo.	Question	Answers	Codes
15.	Diversifying my portfolio.	It's not important at all	1
		It's largely unimportant	2
		Slightly unimportant	3
		I am indifferent	4
		Slightly important	5
		It is largely important	6
		It is absolutely important	7
QNo.	Question	Answers	Codes
16.	For a financial product with the same risk but a higher return, I prefer the higher return	Not at all	1
		Usually not	2
		No	3
		Maybe	4
		Mostly yes	5
		Yes	6
		Absolutely yes	7
QNo.	Question	Answers	Codes
17.	My goal is to invest as much as possible in long-term, predictable, low-risk stocks and financial assets (blue-chip stocks, developed country government bonds etc.)	Not at all	1
		Usually not	2
		No	3
		Maybe	4
		Mostly yes	5
		Yes	6
		Absolutely yes	7
QNo.	Question	Answers	Codes
18.	In my investment portfolio, stocks and financial assets with higher risk represent a significant percentage (government bonds of risky developing countries, start-up investments, cryptocurrencies, etc.)	Not at all	1
		Usually not	2
		No	3
		Maybe	4
		Mostly yes	5
		Yes	6
		Absolutely yes	7
QNo.	Question	Answers	Codes
19.	I prefer to keep my money in a sight deposit for future opportunities	Not at all	1
		Usually not	2
		No	3
		Maybe	4
		Mostly yes	5
		Yes	6
		Absolutely yes	7
QNo.	Question	Answers	Codes
20.	Cryptocurrencies are the investment option with the highest return in the future, which is why I prefer to invest in cryptocurrencies.	Not at all	1
		Usually not	2
		No	3
		Maybe	4
		Mostly yes	5
		Yes	6
		Absolutely yes	7
QNo.	Question	Answers	Codes
21.	Do you typically manage your finances online?	Not at all	1
		Usually not	2
		No	3
		Maybe	4
		Mostly yes	5
		Yes	6
		Absolutely yes	7
QNo.	Question	Answers	Codes
22.	Have you ever heard of green financial products?	Not at all	1
		Usually not	2
		No	3
		Maybe	4
		Mostly yes	5
		Yes	6
		Absolutely yes	7
QNo.	Question	Answers	Codes
23.	Green financial products finance socially higher added value investments.	Not at all	1
		Usually not	2
		No	3
		Maybe	4
		Mostly yes	5
		Yes	6
		Absolutely yes	7
QNo.	Question	Answers	Codes
24.	My goal is to increase the proportion of my investments in green financial products.	Not at all	1
		Usually not	2
		No	3
		Maybe	4
		Mostly yes	5
		Yes	6
		Absolutely yes	7
QNo.	Question	Answers	Codes
25.	Do you think green financial products are safe?	Not at all	1
		Usually not	2
		No	3
		Maybe	4
		Mostly yes	5
		Yes	6
		Absolutely yes	7
QNo.	Question	Answers	Codes
26.	In the case of investments with the same risk, my decision is influenced by the sustainability criteria, not the return	Not at all	1
		Usually not	2
		No	3
		Maybe	4
		Mostly yes	5
		Yes	6
		Absolutely yes	7
QNo.	Question	Answers	Codes
27.	In the case of a green financial product with the same risk but with a higher return, I would rather choose the green financial product than another financial product	Not at all	1
		Usually not	2
		No	3
		Maybe	4
		Mostly yes	5
		Yes	6
		Absolutely yes	7
QNo.	Question	Answers	Codes
28.	Social expectations and long-term sustainable thinking can influence me to invest in green financial products.	Not at all	1
		Usually not	2
		No	3
		Maybe	4
		Mostly yes	5
		Yes	6
		Absolutely yes	7
QNo.	Question	Answers	Codes
29.	My family and environment can influence me to invest in green financial product	Not at all	1
		Usually not	2
		No	3
		Maybe	4
		Mostly yes	5
		Yes	6
		Absolutely yes	7
